# Supplementary material for: Parainfluenza 3-Induced Cough Hypersensitivity in the Guinea Pig Airways
Source: PLoS One. 2016 May 23;11(5):e0155526. doi: 10.1371/journal.pone.0155526 (PMC4877001; doi:10.1371/journal.pone.0155526)
Supplement: S1 File — (XLSX) [file pone.0155526.s001.xlsx]

## Sheet: Sheet1
	S1 File: The data values behind Figs 2-5
		Figure 2							Figure 3
		qPCR_ TRPV1 increase							Number of Coughs
									Figure 3A					capsaicin [uM]							3B				Citric Acid	[M]					3C	Bradykinin [mg/ml]
									saline	0.1	1	3	10		Saline	0.1	1	3	10		Saline	0.01	0.1	0.3		Saline	0.01	0.1	0.3		Control		PIV3
		Data Normalized to actin								Control							PIV3					Control						PIV3			5		23
		Control 1	1.59026		Virus 1	2.40811			1	1	3	6	7		1	4	10	21	30		0	1	2	3		1	2	2	4		8		29
		Control 2	0.0958526		Virus 2	2.6729			1	2	3	8	12		1	4	9	19	31		0	1	3	3		0	1	13	4		3		18
		Control 3	0.624984		Virus 3	2.10996			1	3	5	5	10		1	5	10	18	25		0	2	7	3		0	2	8	8		15		33
		Control 4	0.784758		Virus 4	1.65686			0	3	3	9	8		1	5	8	17	28		1	2	1	6		0	2	3	7		9		21
		Control 5	1.83954		Virus 5	3.4474															0	1	2	8		1	2	3	23		5		31
		Control 6	0.80087		Virus 6	1.16945															1	2	1	9		0	3	4	14		4		7
		Control 7	1.26374		Virus 7	3.5112															0	1	2	2		0	2	3	7		9		11
																					0	1	2	3		1	1	18	7		10		12
																															7		9
				p value with normalization
				0.0299105
									Figure 5						Data not shown
									qPCR_Neurotrophins						We could not detect glial cell line-derived neurotrophic factor (GDNF) in control or virally treated trachea
															(Data mentioned but not shown in manuscript)
	Figure 4								Sample Name	Detector	Ct
	Representative blots are provided for Figure 4 graph.								Control	actin	16.3274
									Control	actin	16.5557
									Control	actin	16.7034
									Control	actin	17.2042
									Virus	actin	16.1512
									Virus	actin	16.5985
									Virus	actin	16.8159
									Virus	actin	16.7431
									Control	Artn	23.7952
									Control	Artn	23.8658
									Control	Artn	22.875
									Control	Artn	23.2792
									Virus	Artn	22.97
									Virus	Artn	23.5691
									Virus	Artn	22.6377
									Virus	Artn	23.4119
									Control	NGF	21.8199
									Control	NGF	21.6907
									Control	NGF	21.2536
									Control	NGF	22.6238
									Virus	NGF	20.8502
									Virus	NGF	21.4064
									Virus	NGF	21.0927
									Virus	NGF	22.7464
									Control	BDNF	25.8996
									Control	BDNF	25.425
									Control	BDNF	22.6687
									Control	BDNF	22.2949
									Virus	BDNF	25.7808
									Virus	BDNF	24.6475
									Virus	BDNF	22.38
									Virus	BDNF	22.0183
